# Supplementary material for: Blockade of leukemia inhibitory factor as a therapeutic approach to KRAS driven pancreatic cancer
Source: PubMed Central journal article supplement (PMC6624260; doi:10.1038/s41467-019-11044-9), 2019-07-11

Fig 2a.

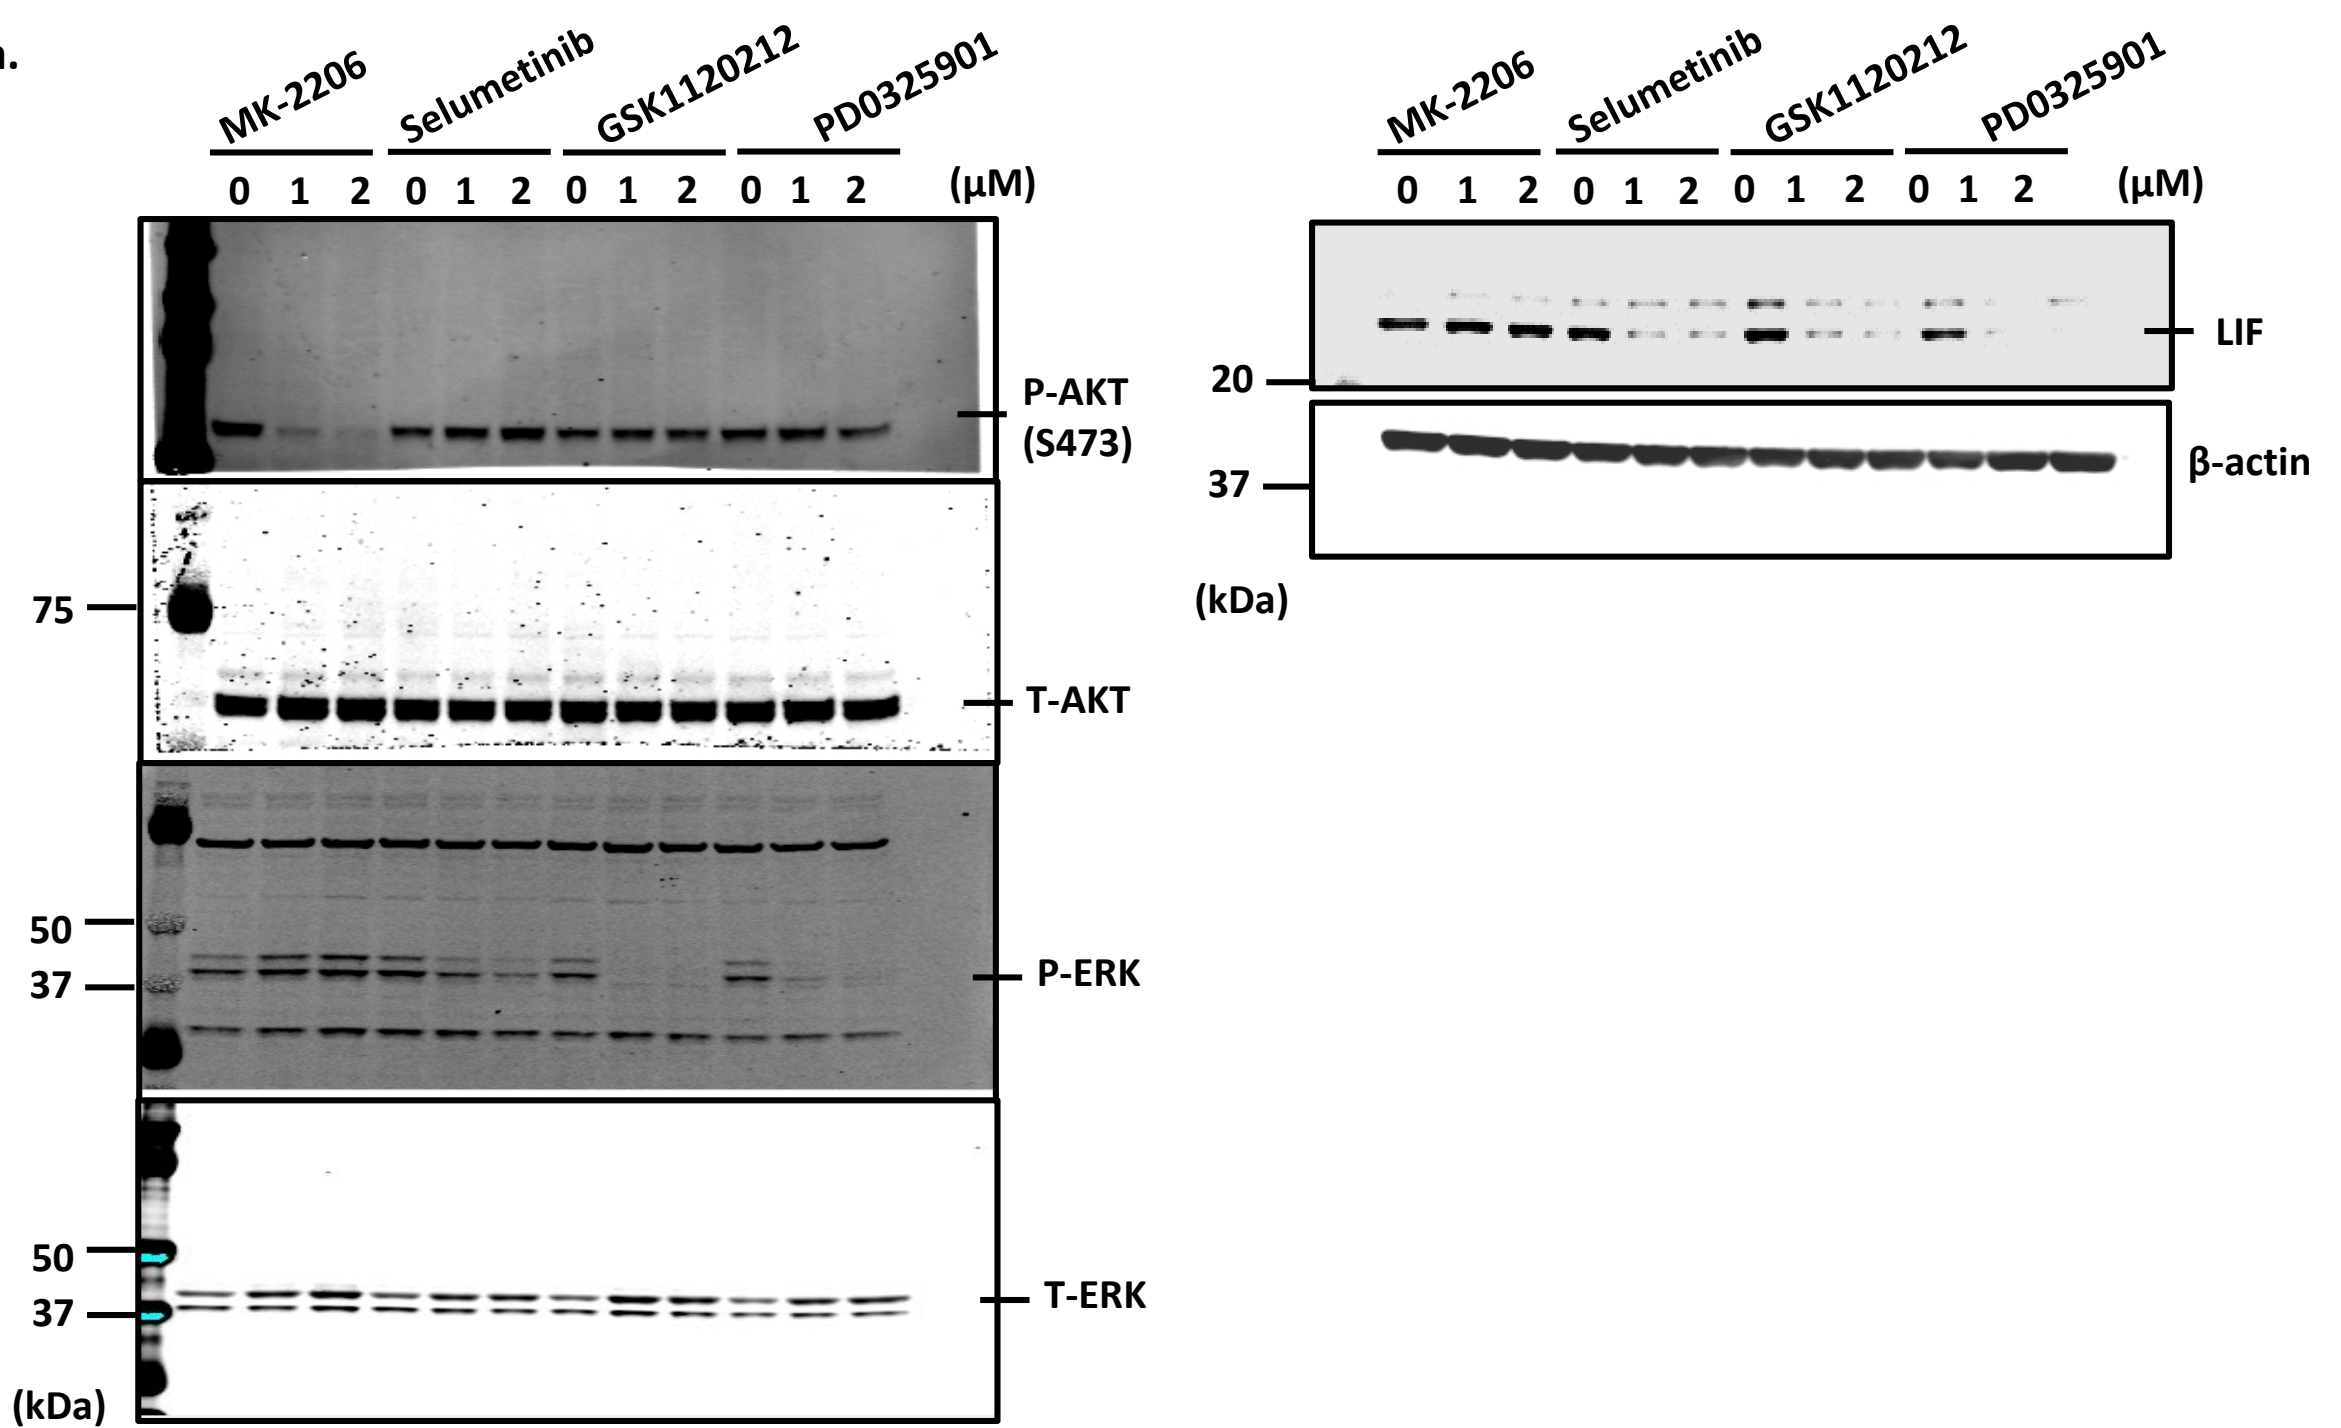

Fig 4b.

Panc6.03

Panc1.0

+ LIF      + IL6      + LIF      + IL6      + LIF      + IL6      + LIF      + IL6  
D25.1.4: 0 1 5 0 1 5      0 1 5 0 1 5      0 1 5 0 1 5      0 1 5 0 1 5 (µg/mL)

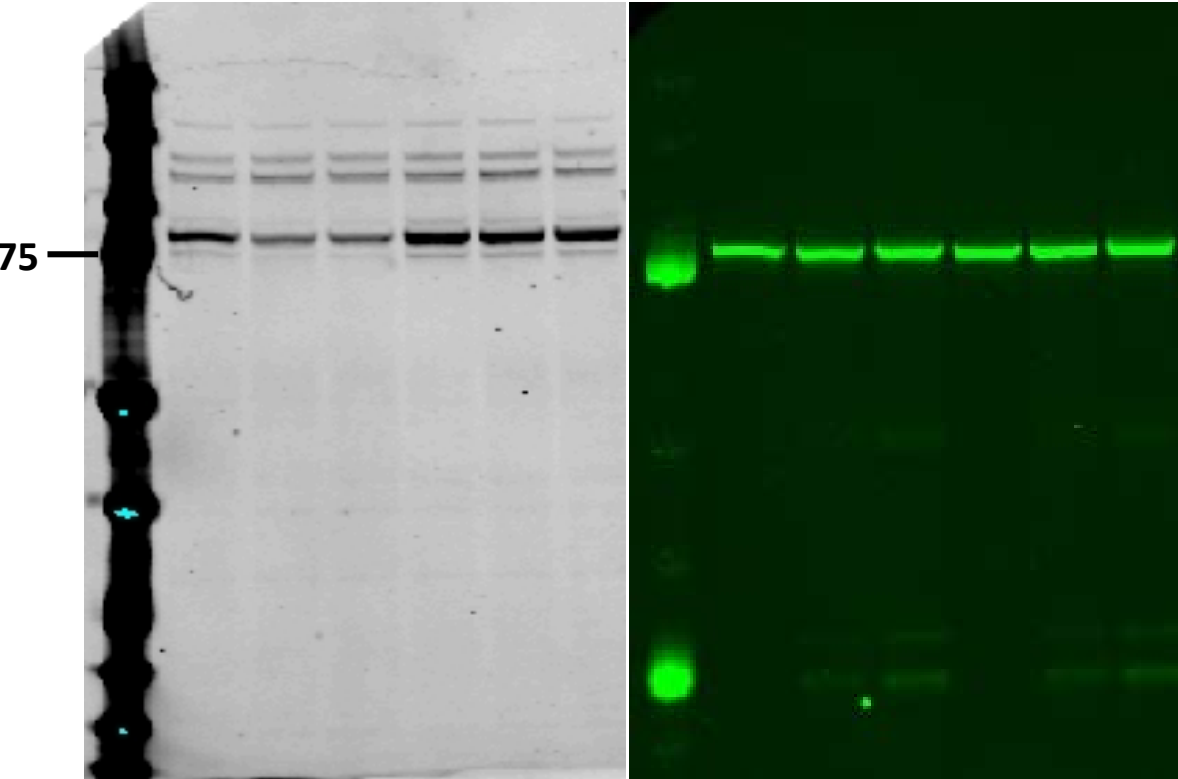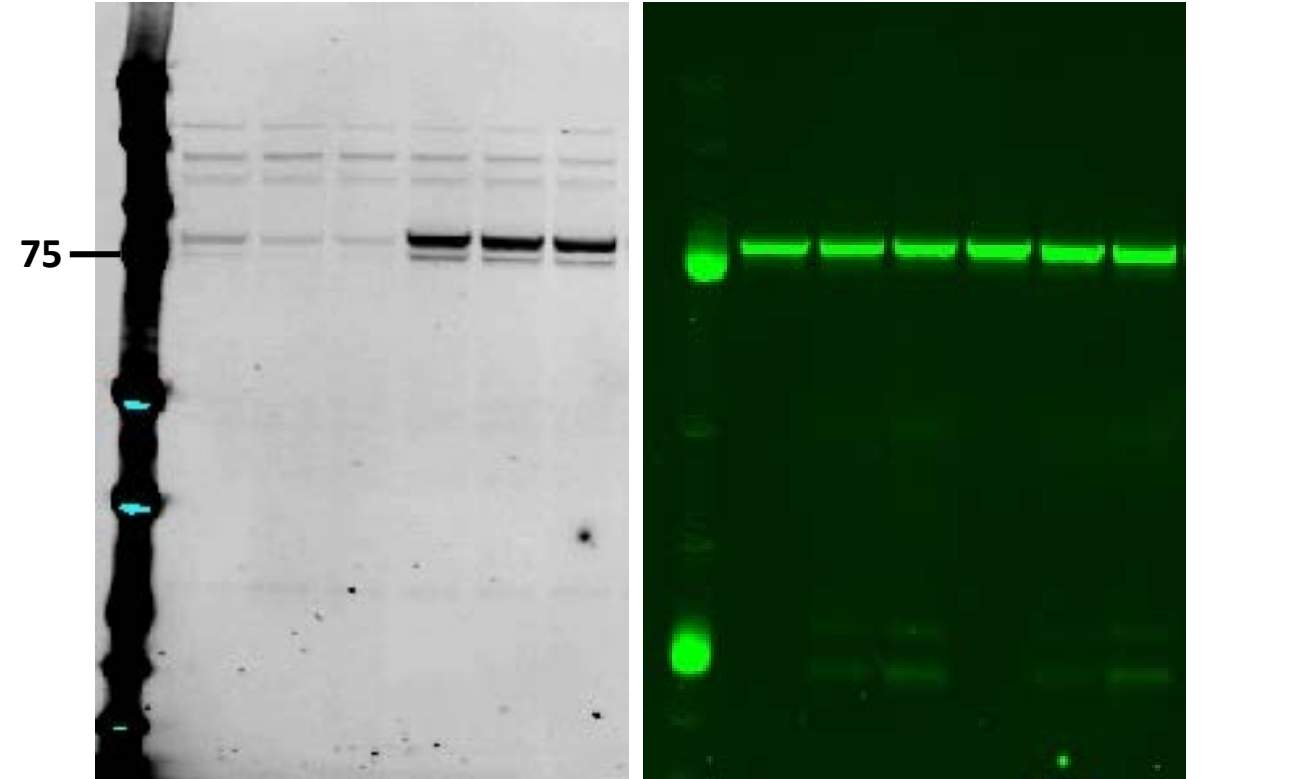

(kDa) P-STAT3 (Y705)

T-STAT3

(kDa) P-STAT3 (Y705)

T-STAT3

Fig 5b.

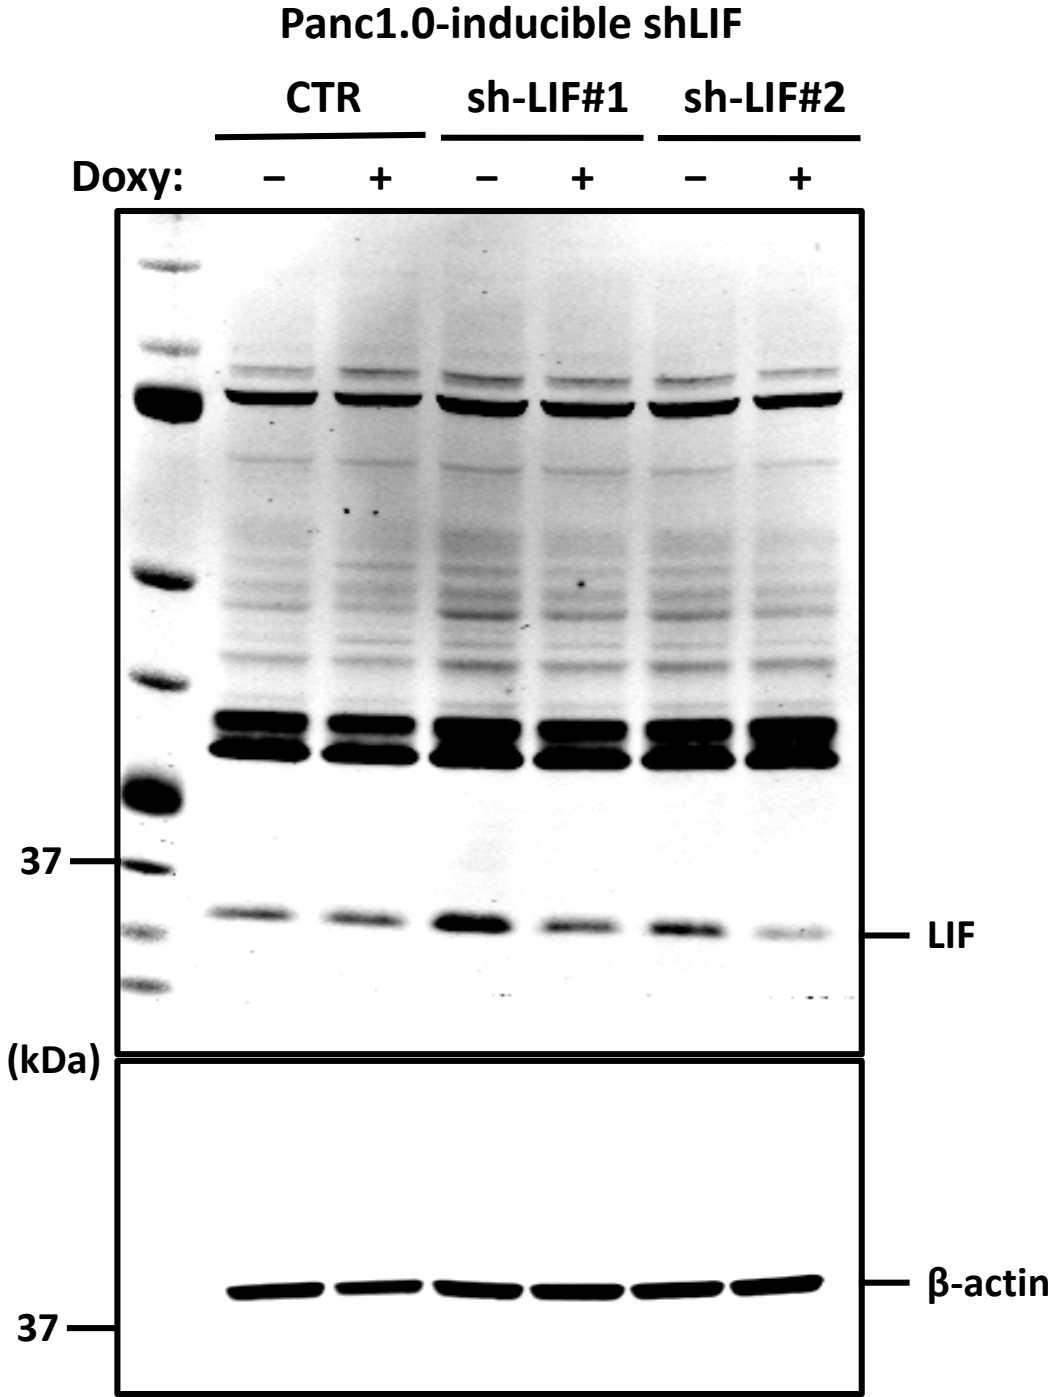

Fig 5d.

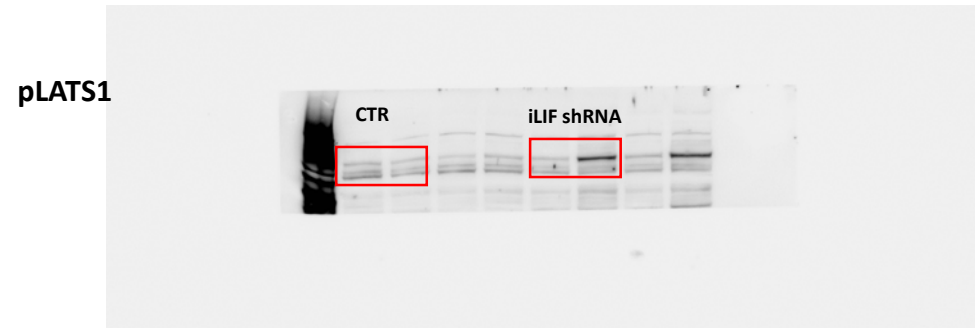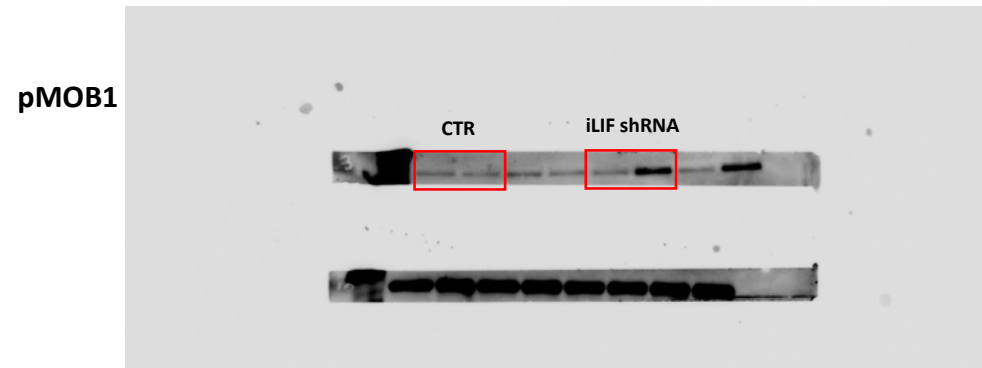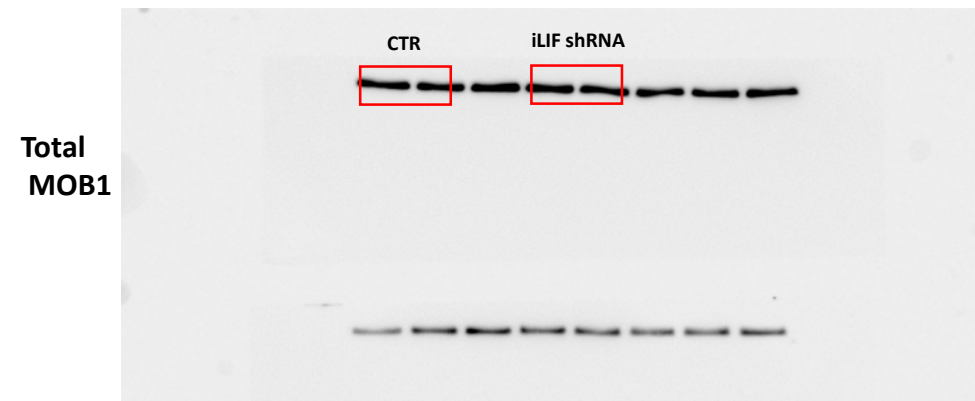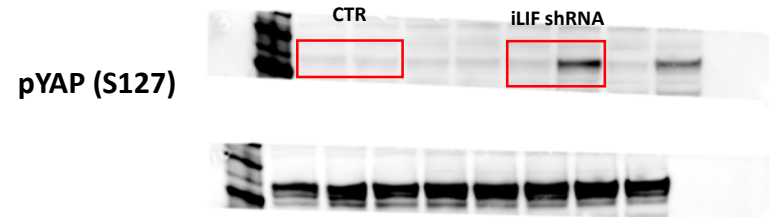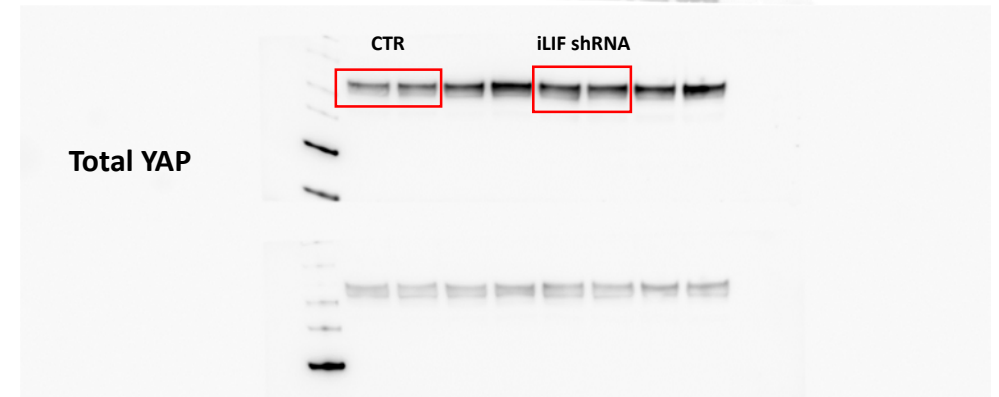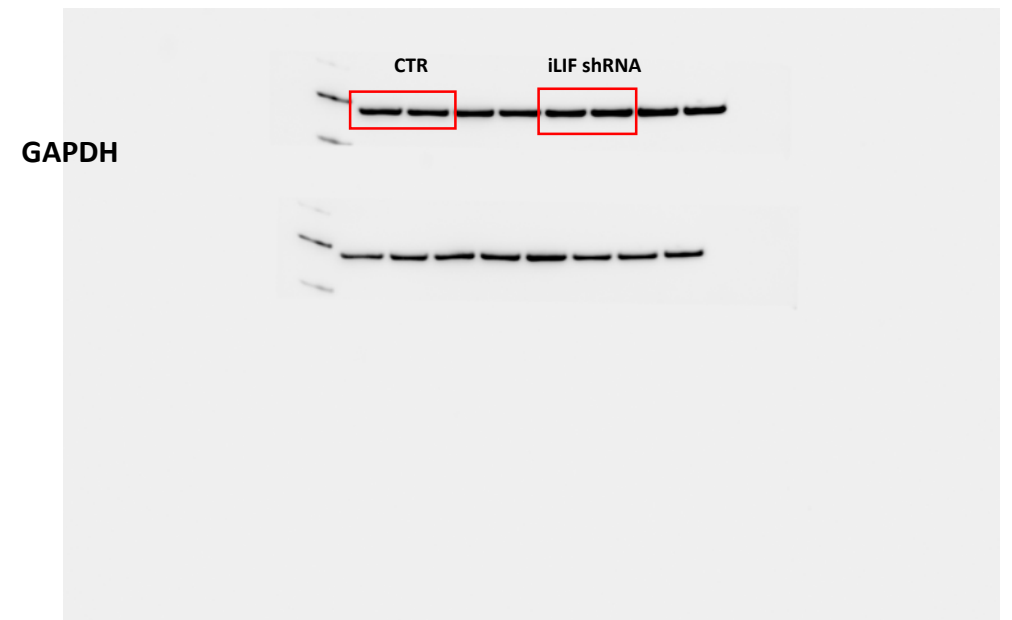

Fig 5e.

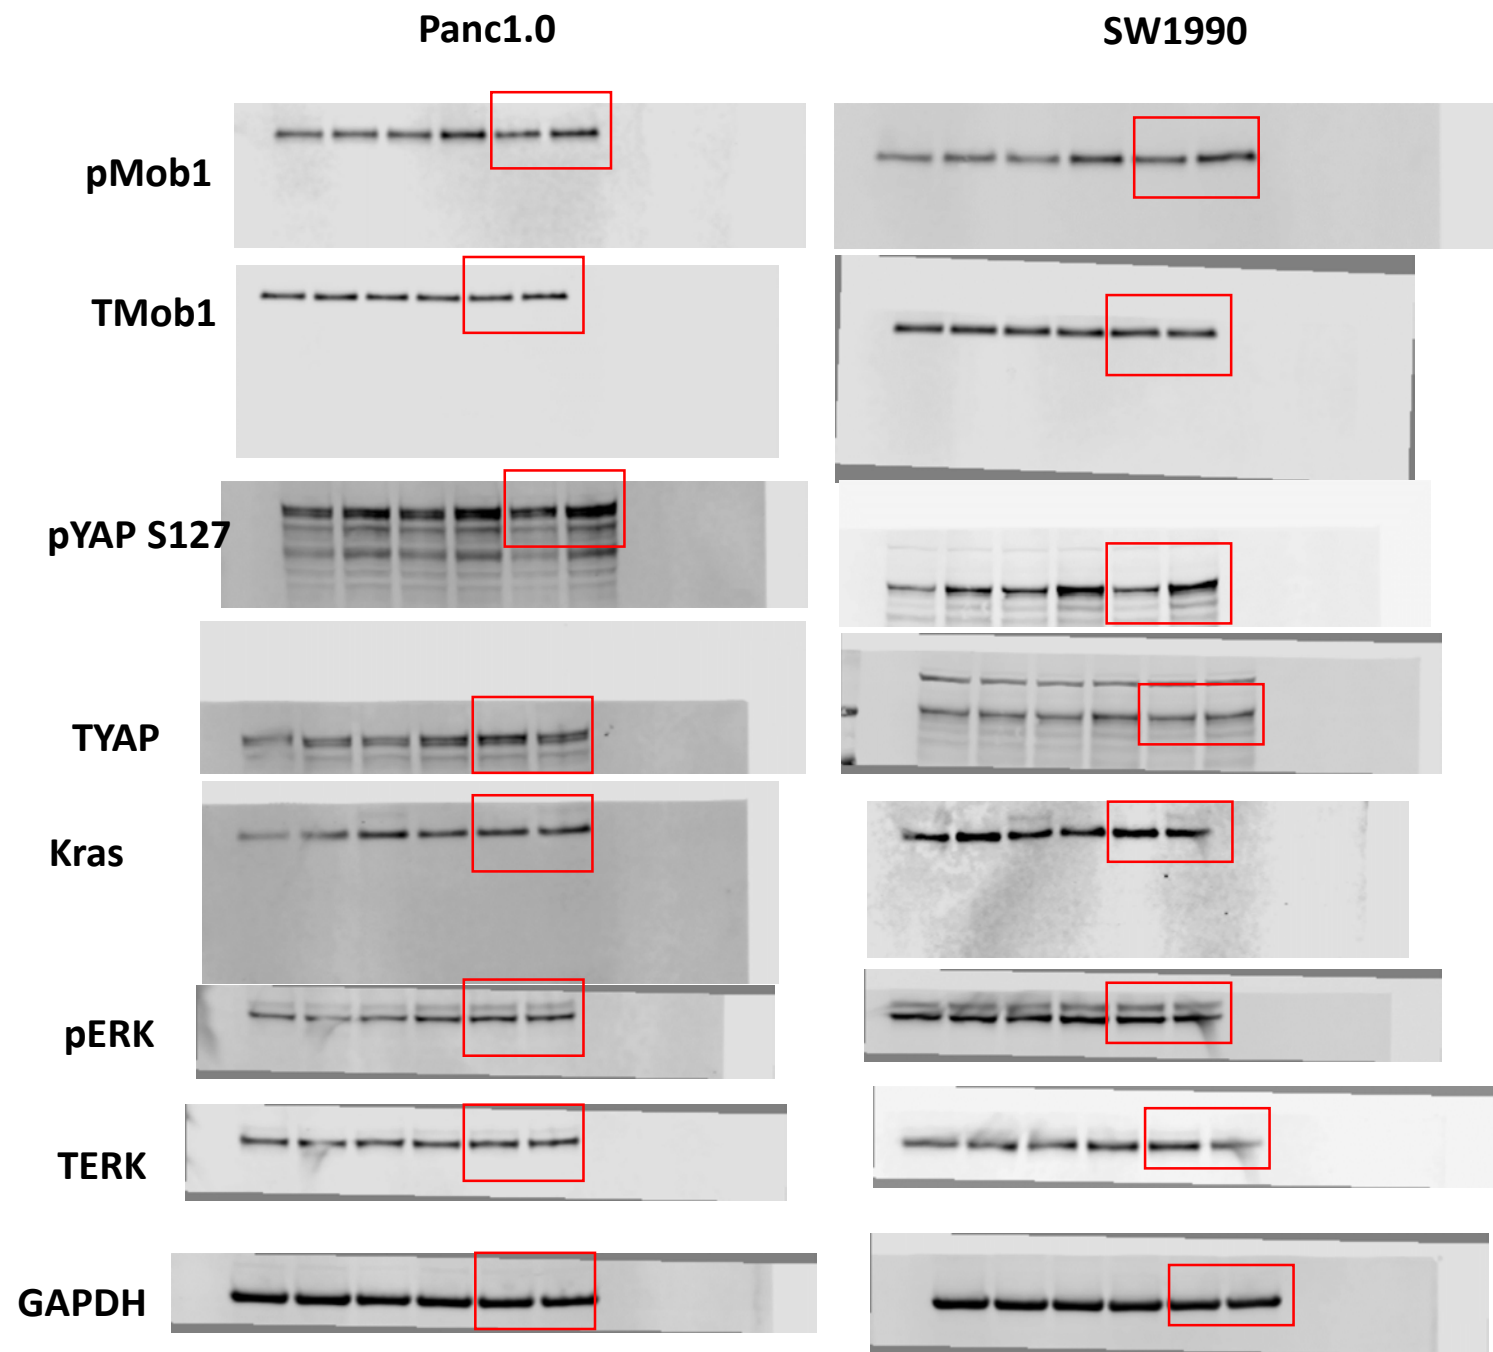

Supplement: 41467_2019_11044_MOESM5_ESM.pdf [file 41467_2019_11044_MOESM5_ESM.pdf]
